# Supplementary material for: Carbonic anhydrase is involved in calcification by the benthic foraminifer Amphistegina lessonii
Source: Copernicus journal article supplement (doi:10.5194/bg-18-393-2021), 2021-01-18
Supplement: Supplementary file 1 [file bg-18-393-2021-supplement.pdf]

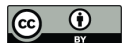

*Supplement of*

## **Carbonic anhydrase is involved in calcification by the benthic foraminifer *Amphistegina lessonii***

**Siham de Goeyse et al.**

*Correspondence to:* Siham de Goeyse ([siham.de.goeyse@nioz.nl](mailto:siham.de.goeyse@nioz.nl))

The copyright of individual parts of the supplement might differ from the CC BY 4.0 License.

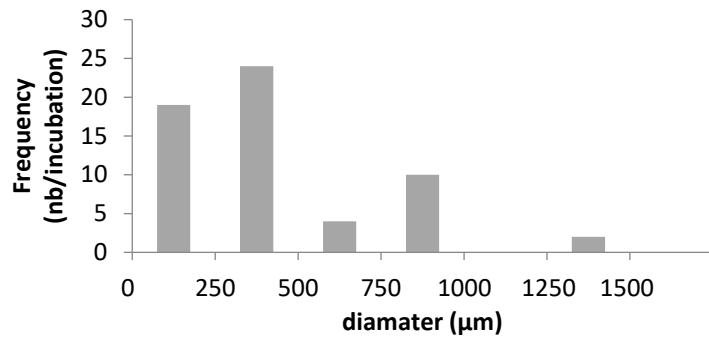

**S1: Size distribution of specimens used during the experiment: initial diameter of foraminifera for one replicate**

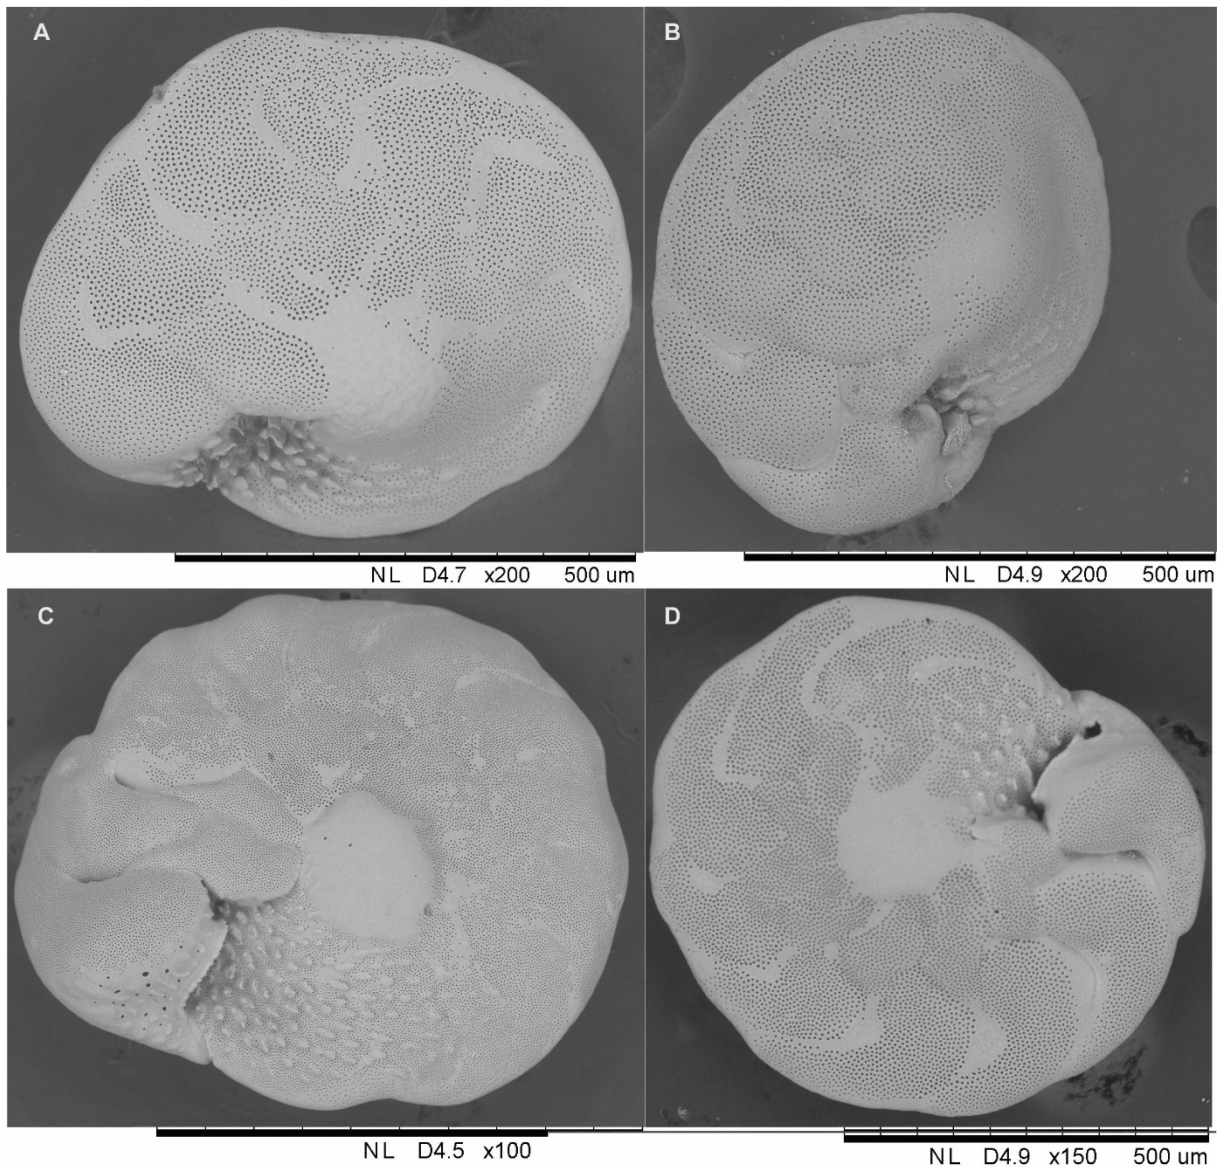

**S2: SEM images of foraminifera grown under different conditions (A: DCUM, B: Dark, C: AZ , D: control)**
